# Supplementary material
Source: PubMed Central journal article supplement (PMC7071891)
Supplement: pnas.1916897117.sapp.pdf [file pnas.1916897117.sapp.pdf]

Supplementary Information for:

## **Interferon lambda promotes immune dysregulation and tissue inflammation in TLR7-induced lupus**

Rishi R. Goel, Xinghao Wang, Liam J. O'Neil, Shuichiro Nakabo, Kowser Hasneen, Sarthak Gupta, Gustaf Wigerblad, Luz P. Blanco, Jeffrey B. Kopp, Maria I. Morasso, Sergei V. Kotenko, Zu-Xi Yu, Carmelo Carmona-Rivera, Mariana J. Kaplan

Corresponding author: Mariana J. Kaplan

Email: [mariana.kaplan@nih.gov](mailto:mariana.kaplan@nih.gov)

### **This PDF file includes:**

Figures S1 to S16

Tables S1 to S3

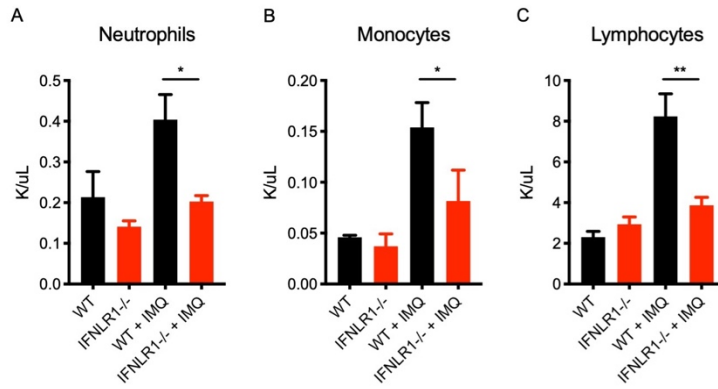

**Supplemental Figure 1. IFN- $\lambda$  promotes leukocytosis. (A,B,C)** Immune cell counts in peripheral blood after 5 weeks of IMQ treatment (n=3 WT, n=4 *Ifnlr1*<sup>-/-</sup>, n=16 WT + IMQ, n=12 *Ifnlr1*<sup>-/-</sup> + IMQ). Data are represented as mean +/- SEM. Statistics were calculated by non-parametric Mann-Whitney test. \*p < 0.05, \*\*p < 0.01.

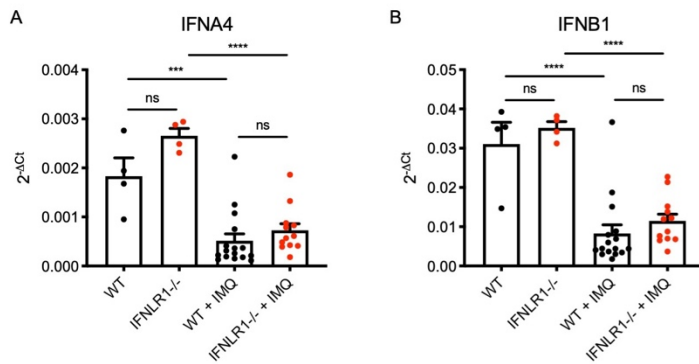

**Supplemental Figure 2. *Ifnlr1*-deficiency does not affect expression of type I interferons. (A,B)** IFNA4 and IFNB1 expression in murine lupus skin. Gene expression was measured in ear tissue after 5 weeks of IMQ treatment by qPCR (n=4 WT, n=4 *Ifnlr1*<sup>-/-</sup>, n=16 WT + IMQ, n=12 *Ifnlr1*<sup>-/-</sup> + IMQ). Data are represented as mean +/- SEM. Statistics were calculated by one-way ANOVA with Tukey's correction for multiple comparisons. \*p < 0.05, \*\*p < 0.01, \*\*\*p < 0.001, \*\*\*\*p < 0.0001.

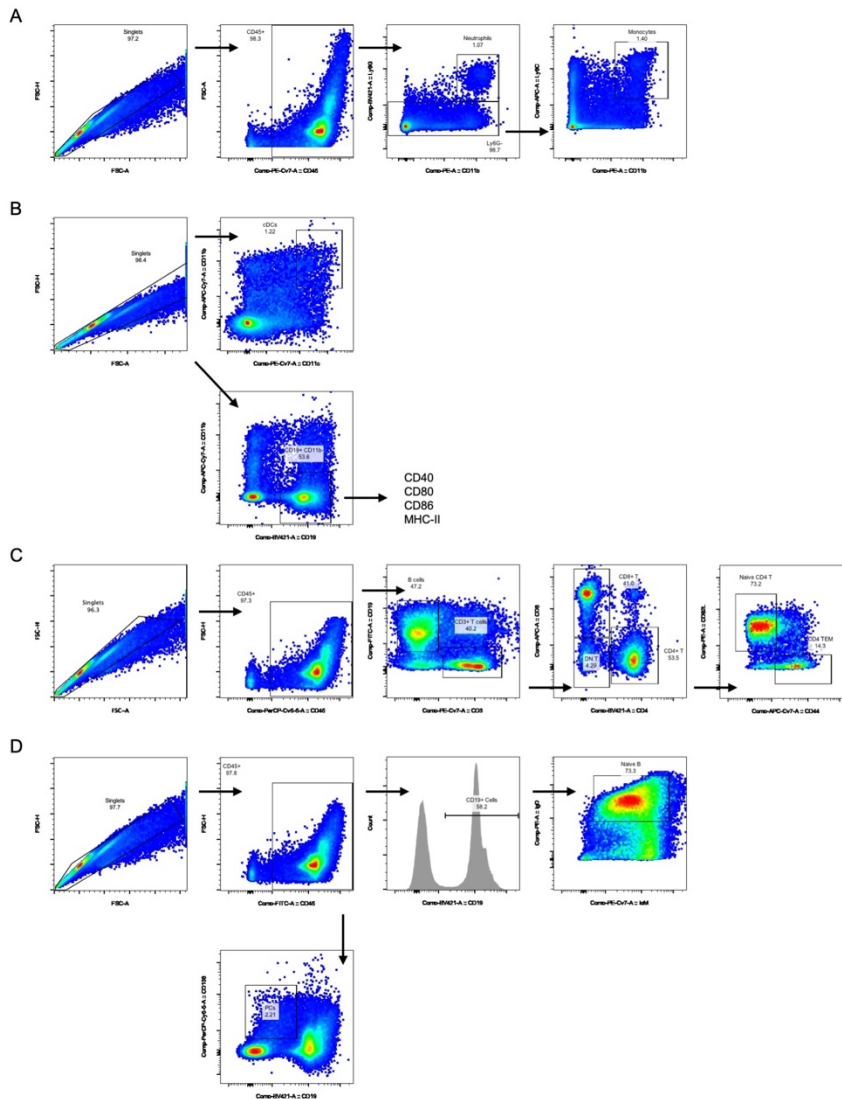

**Supplemental Figure 3. Full gating strategy for immune phenotyping of mouse spleen. (A)** Neutrophils were identified as CD45<sup>+</sup> CD11b<sup>+</sup> Ly6G<sup>+</sup> cells, monocytes were identified as CD45<sup>+</sup> Ly6G<sup>-</sup> CD11b<sup>+</sup> Ly6C<sup>+</sup> cells. **(B)** Conventional dendritic cells were identified as CD11b<sup>+</sup> CD11c<sup>+</sup> cells, B cells were identified as CD19<sup>+</sup> CD11b<sup>-</sup> cells. **(C)** T cells were identified as CD45<sup>+</sup> CD3<sup>+</sup> CD19<sup>-</sup> cells; cells were further gated on CD4<sup>+</sup>, CD8<sup>+</sup> or double negative populations and activation status was determined by expression of CD62L and CD44. **(D)** Plasma cells were identified as CD45<sup>+</sup> CD19<sup>-/low</sup> CD138<sup>+</sup> cells, naïve B cells were identified as CD45<sup>+</sup> CD19<sup>+</sup> IgM<sup>+</sup> IgD<sup>+</sup> cells.

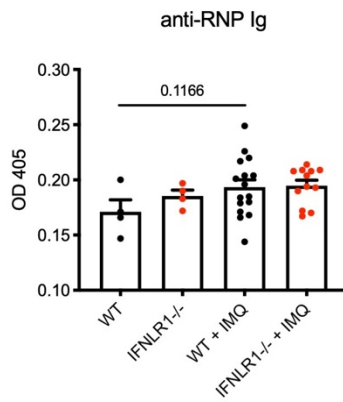

**Supplemental Figure 4. IFN- $\lambda$  does not affect anti-RNP autoantibodies.** Antibodies were quantified by ELISA in mouse serum after 5 weeks of IMQ treatment (n=4 WT, n=4 *Ifnlr1*<sup>-/-</sup>, n=16 WT + IMQ, n=12 *Ifnlr1*<sup>-/-</sup> + IMQ). Data are represented as mean +/- SEM. Statistics were calculated by non-parametric Mann-Whitney test.

A

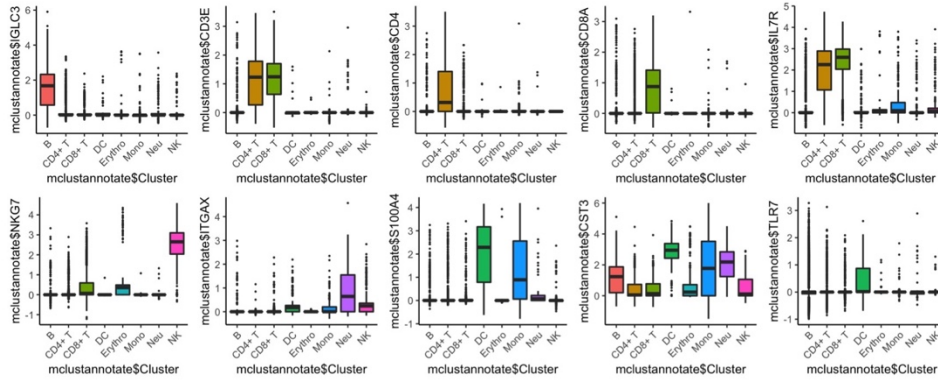

B

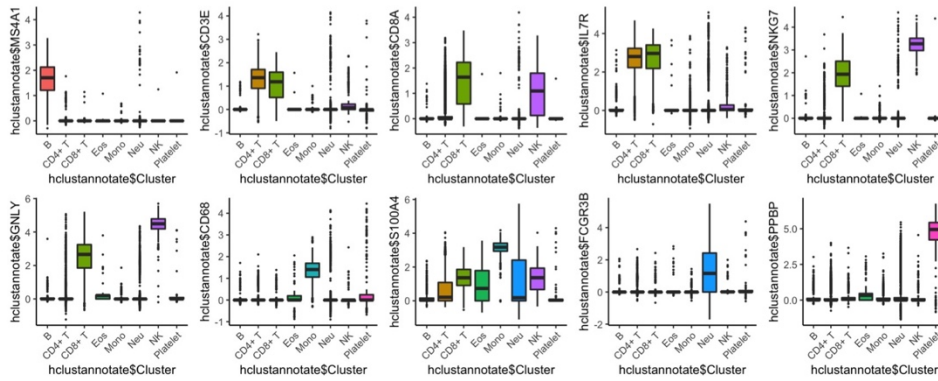

**Supplemental Figure 5. Single cell cluster annotation. (A)** Cell marker expression in mouse immune cell clusters. **(B)** Cell marker expression in human immune cell clusters. Data are represented as boxplots (median with interquartile range).

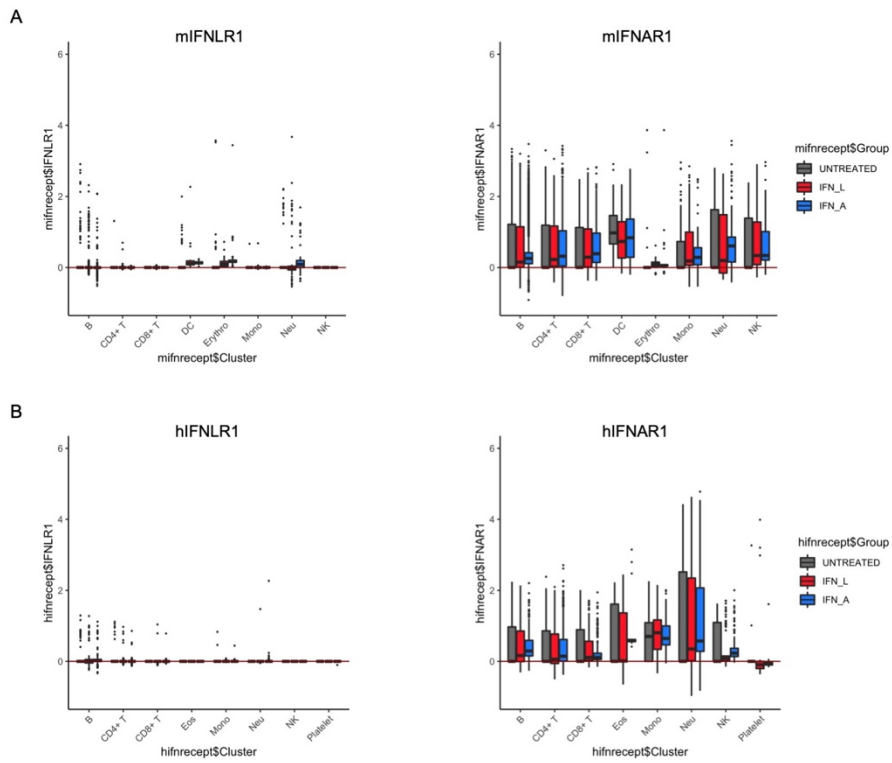

**Supplemental Figure 6. Interferon receptor expression in immune cell clusters. (A) IFNLR1 and IFNAR1 expression in mouse immune cell clusters. (B) IFNLR1 and IFNAR1 expression in human immune cell clusters. Data are represented as boxplots (median with interquartile range).**

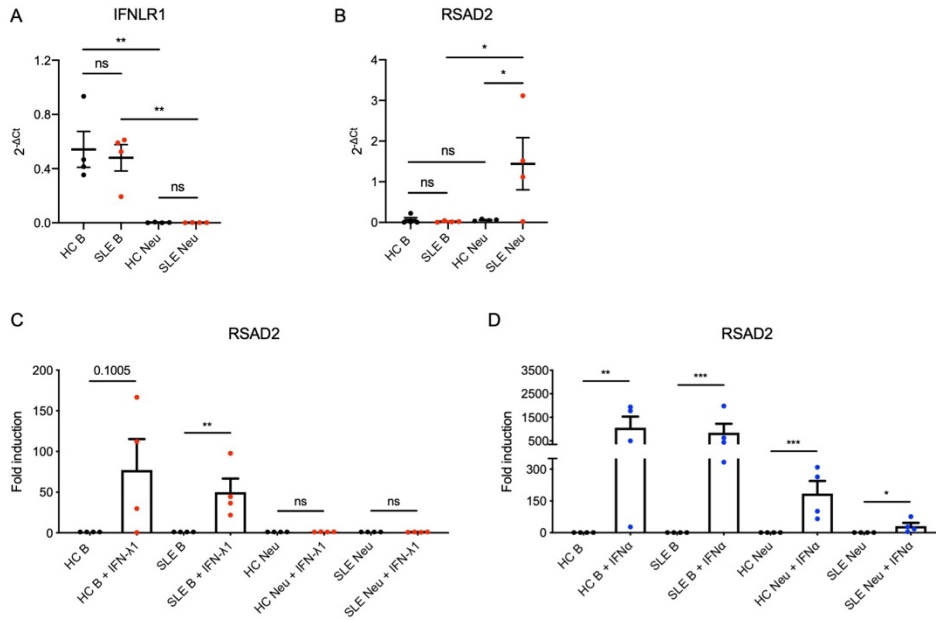

**Supplemental Figure 7. IFN- $\lambda$  induces similar responses in healthy control and SLE leukocytes.** (A) IFNL1 and (B) RSAD2 expression in healthy control and SLE B cells or neutrophils (n=4 patients/group). PBMCs were isolated by Ficoll density gradient and B cells were subsequently purified by negative selection using a STEMCELL kit. Neutrophils were isolated by dextran sedimentation. Gene expression was determined by qPCR. (C) IFN- $\lambda$  and (D) IFN-alpha response in healthy control and SLE B cells or neutrophils (n=4 patients/group). Cells were isolated as described above and treated with 100ng/mL recombinant cytokine for 4 hours. Gene expression was determined by qPCR and normalized to the paired untreated sample. Data are represented as mean +/- SEM. Statistics were calculated by one-way ANOVA with Tukey's correction for multiple comparisons or ratio paired t-test. \*p < 0.05, \*\*p < 0.01, \*\*\*p < 0.001.



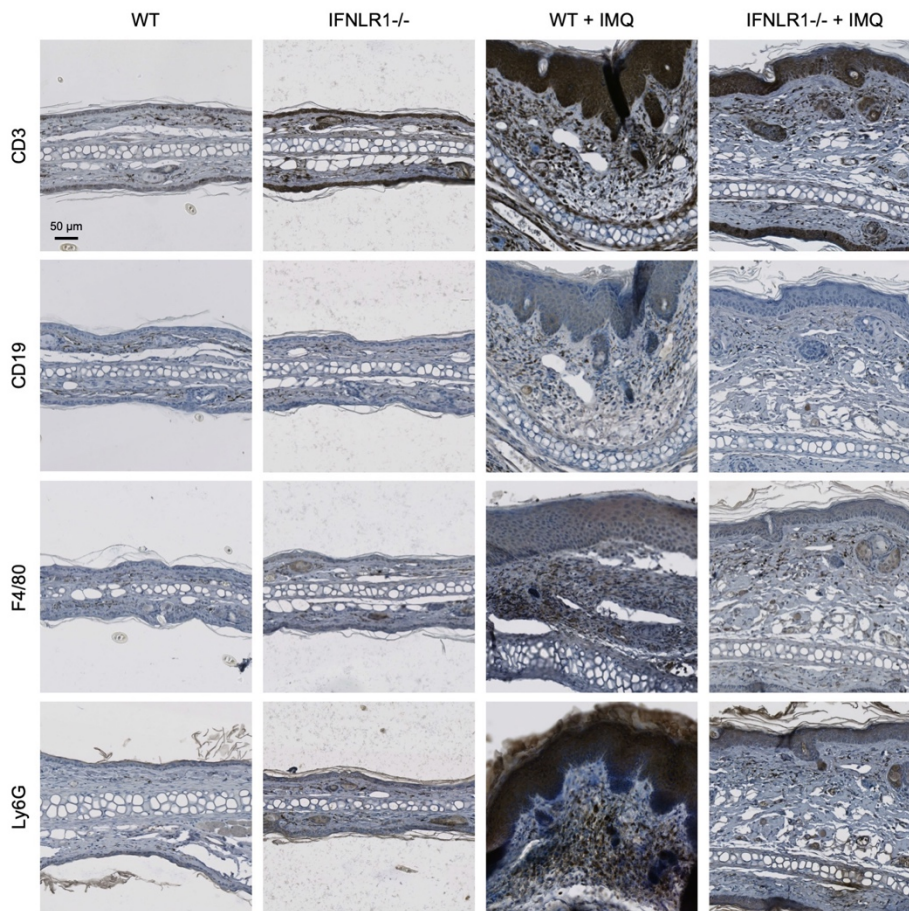

**Supplemental Figure 8. Immunohistochemistry for immune cell subsets in murine lupus skin.** Tissue sections were prepared after 5 weeks of IMQ treatment and stained for CD3, CD19, F4/80, and Ly6G as indicated.

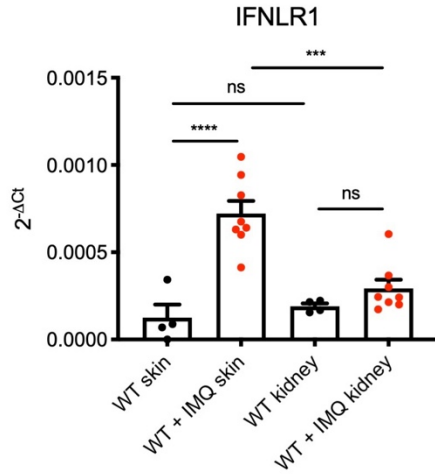

**Supplemental Figure 9. IFN- $\lambda$  receptor expression is increased in murine lupus skin.** IFNLR1 gene expression was measured in ear and kidney tissue after 5 weeks of IMQ treatment by qPCR (n=4 WT, n=8 WT + IMQ). Data are represented as mean +/- SEM. Statistics were calculated by one-way ANOVA with Sidak correction for multiple comparisons. \*p < 0.05, \*\*p < 0.01, \*\*\*p < 0.001, \*\*\*\*p < 0.0001.

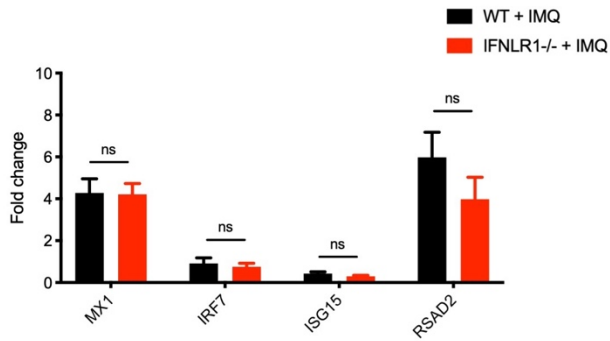

**Supplemental Figure 10. *Ifnlr1*-deficiency does not reduce ISG expression in skin.**

ISG expression in murine lupus skin. Gene expression was measured in ear tissue after 5 weeks of IMQ treatment by qPCR (n=8 untreated, n=8 WT + IMQ, n=7 *Ifnlr1*<sup>-/-</sup> + IMQ). Data are normalized to untreated mice. Data are represented as mean +/- SEM. Statistics were calculated by non-parametric Mann-Whitney test.

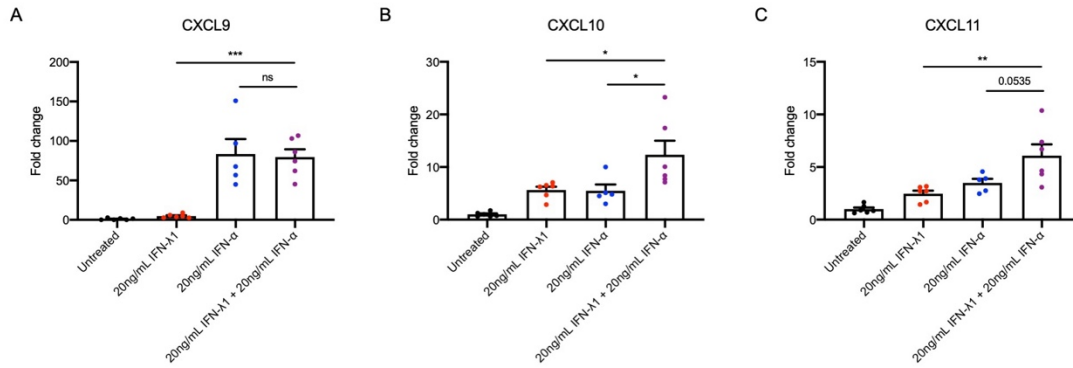

**Supplemental Figure 11. IFN-λ and IFN-alpha have additive effects on chemokine expression by keratinocytes. (A,B,C)** HaCaT keratinocytes were treated with 20ng/mL of IFN-λ1, IFN-α, or both. Chemokine expression was measured after 24 hours by qPCR (n=5-6/group). Data are represented as mean +/- SEM. Statistics were calculated by one-way ANOVA with Sidak correction for multiple comparisons. \*p < 0.05, \*\*p < 0.01, \*\*\*p < 0.001.

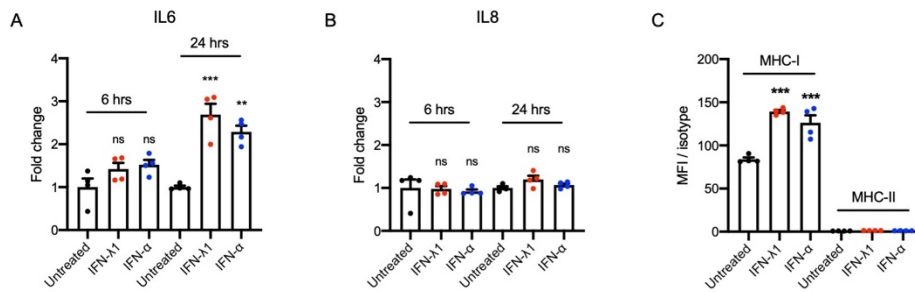

**Supplemental Figure 12. IFN-λ induces *IL6* and MHC-I, but not *IL8* or MHC-II**

**expression by keratinocytes.** HaCaT keratinocytes were treated with 20ng/mL of IFN-λ1 or IFN-alpha. **(A)** *IL6* and **(B)** *IL8* expression were measured at the indicated time points by qPCR (n=4 per group). **(C)** Surface MHC-I and MHC-II expression were measured after 48 hours by flow cytometry (n=4 per group). MFI values were normalized to an isotype control for each sample. Data are represented as mean +/- SEM. Statistics were calculated by one-way ANOVA with Tukey's correction for multiple comparisons. \*p < 0.05, \*\*p < 0.01, \*\*\*p < 0.001.

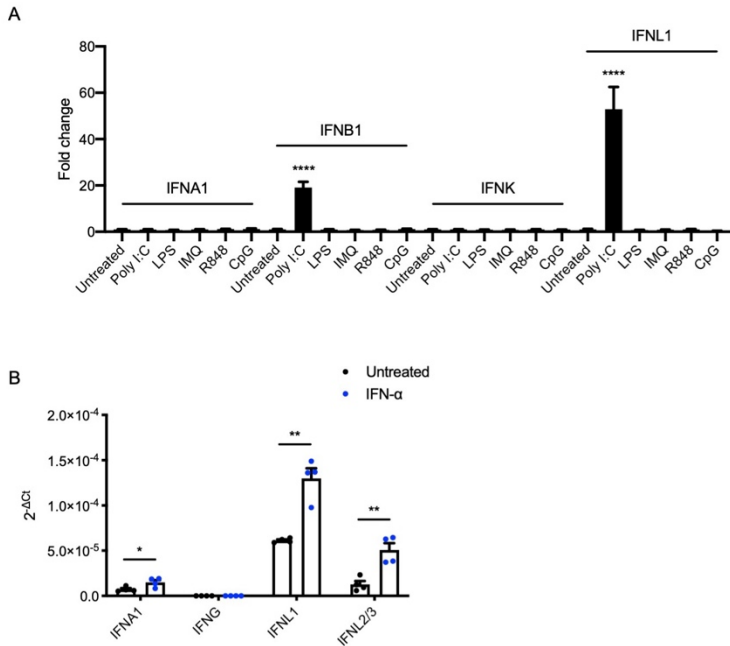

**Supplemental Figure 13. Keratinocytes do not produce IFN-λ in response to TLR7 stimulation.** (A) HaCaT keratinocytes were treated with 1ug/mL Poly I:C, 1ug/mL LPS, 5ug/mL IMQ, 5ug/mL R848, or 2nM CpG for 4 hours (n=4/group). IFN gene expression was determined by qPCR. (B) HaCaT keratinocytes were treated with 20ng/mL IFN-alpha for 6 hours; IFN genes were quantified by qPCR (n=4 per group). Data are represented as mean +/- SEM. Statistics were calculated by one-way ANOVA with Tukey's correction for multiple comparisons. \*p < 0.05, \*\*p < 0.01, \*\*\*p < 0.001, \*\*\*\*p < 0.0001.

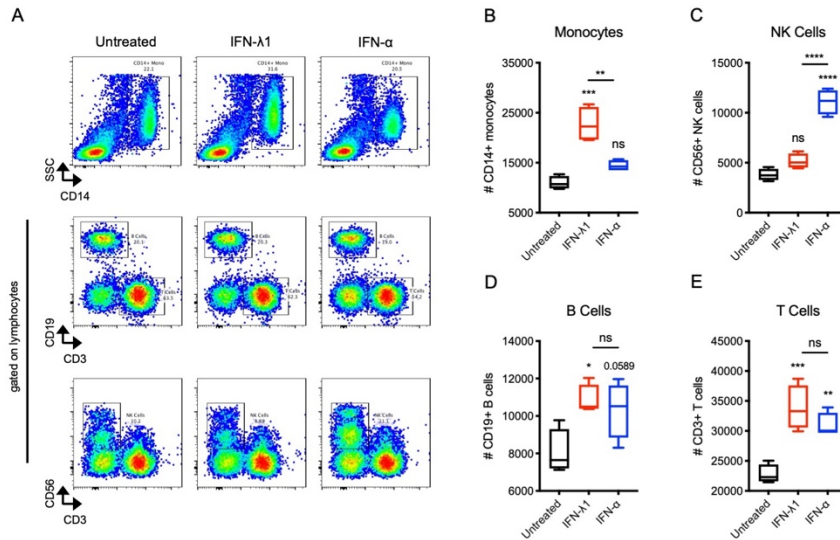

**Supplemental Figure 14. IFN-λ preferentially induces migration of leukocyte subsets.** 500,000 healthy donor PBMCs were seeded in the top chamber of a transwell insert and incubated with culture supernatants from keratinocytes treated with IFN for 48 hours (n=4/group). Cells migrated into the bottom chamber were analyzed after 24 hours in the transwell culture. **(A)** Representative gating strategy of migrated cells. Total number of **(B)** CD14+ monocytes, **(C)** NK cells, **(D)** B cells, and **(E)** T cells as determined by flow cytometry in the migrated cell fraction. Data are represented as median +/- min/max (boxplots). Statistics were calculated by one-way ANOVA with Tukey's correction for multiple comparisons. \*p < 0.05, \*\*p < 0.01, \*\*\*p < 0.001, \*\*\*\*p < 0.0001.

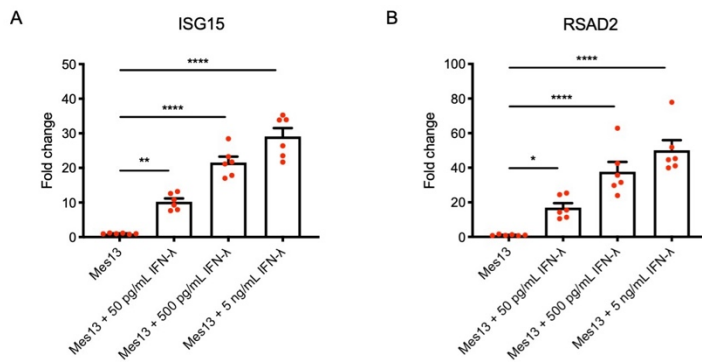

**Supplemental Figure 15. Dose-dependent responses to IFN-λ by Mes13 mesangial cells.** (A,B) Mes13 cells were treated with the indicated concentrations of IFN-λ2 (n=6/group) for 24 hours. ISG expression was determined by qPCR. Data are represented as mean +/- SEM. Statistics were calculated by one-way ANOVA with Dunnett correction for multiple comparisons. \*p < 0.05, \*\*p < 0.01, \*\*\*p < 0.001, \*\*\*\*p < 0.0001.



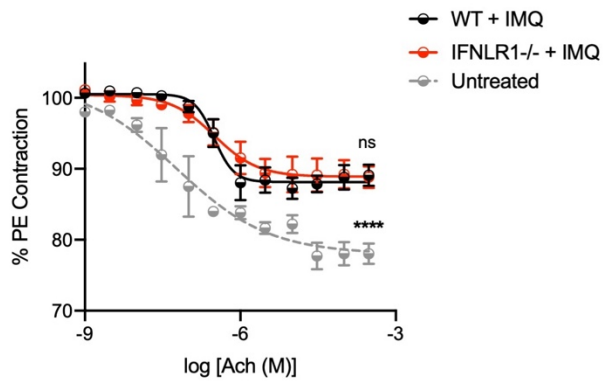

**Supplemental Figure 16. *Ifnlr1*-deficiency does not protect mice from lupus-associated vasculopathy.** Aortic rings were isolated from untreated, WT + IMQ, and IFNLR1-/- + IMQ mice. Acetylcholine-dependent vasorelaxation was determined following phenylephrine (PE) precontraction (n=6 mice/group). Statistics were calculated by two-way ANOVA with Tukey's correction for multiple comparisons. \*\*\*\*p < 0.0001.

| <b>Mouse Probes</b> | <b>Taqman Assay ID</b> |
|---------------------|------------------------|
| CXCL9               | Mm00434946_m1          |
| CXCL10              | Mm00445235_m1          |
| CXCL11              | Mm00444662_m1          |
| MX1                 | Mm00487796_m1          |
| IRF7                | Mm00516793_g1          |
| ISG15               | Mm01705338_s1          |
| RSAD2               | Mm00491265_m1          |
| IFNA4               | Mm00833969_s1          |
| IFNB1               | Mm00439552_s1          |
| IFNLR1              | Mm00558035_m1          |
| TLR7                | Mm00446590_m1          |
| IL6                 | Mm00446190_m1          |
| TLSP                | Mm01157588_m1          |
| GAPDH               | Mm99999915_g1          |
|                     |                        |
| <b>Human Probes</b> | <b>Taqman Assay ID</b> |
| CXCL9               | Hs00171065_m1          |
| CXCL10              | Hs00171042_m1          |
| CXCL11              | Hs00171138_m1          |
| MX1                 | Hs00895608_m1          |
| RSAD2               | Hs00369813_m1          |
| IFNA1               | Hs04189288_g1          |
| IFNB1               | Hs01077958_s1          |
| IFNL1               | Hs00601677_g1          |
| IFNL2/3             | Hs04193049_gH          |
| IFNK                | Hs00737883_m1          |
| IFNG                | Hs00989291_m1          |
| IL6                 | Hs00174131_m1          |
| IL8                 | Hs00174103_m1          |
| TSLP                | Hs00263639_m1          |
| GAPDH               | Hs02786624_g1          |

**Supplemental Table 1. List of TaqMan qPCR probes and Assay IDs.**

| <b>Immunofluorescence Antibodies</b>    | <b>Vendor</b>                     | <b>Dilution</b> |
|-----------------------------------------|-----------------------------------|-----------------|
| anti-mouse TLR7                         | Novus Biologicals                 | 1:100           |
| anti-Siglec H (440c)                    | abcam                             | 1:100           |
| anti-citrullinated histone H3 (ab5103)  | abcam                             | 1:100           |
| A555 goat anti-rat secondary            | Invitrogen                        | 1:200           |
| A555 goat-anti-rabbit secondary         | Invitrogen                        | 1:200           |
| A488 goat anti-mouse secondary          | Invitrogen                        | 1:200           |
| FITC anti-mouse C3                      | Immunology Consultants Laboratory | 1:100           |
| A594 anti-mouse IgG F(ab') <sub>2</sub> | Invitrogen                        | 1:250           |

| <b>Immunohistochemistry Antibodies</b> | <b>Vendor</b> |
|----------------------------------------|---------------|
| anti-Ly6G (RB6-8C5)                    | abcam         |
| anti-F4/80 (BM8)                       | abcam         |
| anti-CD3 (ab5690)                      | abcam         |
| anti-CD19 (6OMP31)                     | eBioscience   |

| <b>FACS Antibody</b> | <b>Dilution</b> | <b>Application</b> | <b>Clone</b> | <b>Fluorophore</b> | <b>Target Species</b> | <b>Manufacturer</b> |
|----------------------|-----------------|--------------------|--------------|--------------------|-----------------------|---------------------|
| TruStain FcX         | 1:100           | FACS               | -            | -                  | Mouse                 | Biolegend           |
| anti-CD3             | 1:50            | FACS               | 17A2         | PE/Cy7             | Mouse                 | Biolegend           |
| anti-CD4             | 1:50            | FACS               | GK1.5        | BV421              | Mouse                 | Biolegend           |
| anti-CD8             | 1:50            | FACS               | 53-6.7       | APC                | Mouse                 | Biolegend           |
| anti-CD11b           | 1:50            | FACS               | M1/70        | APC/Cy7, PE        | Mouse                 | Biolegend           |
| anti-CD11c           | 1:50            | FACS               | N418         | PE/Cy7, APC        | Mouse                 | Biolegend           |
| anti-CD19            | 1:50            | FACS               | 6D5          | BV421, FITC        | Mouse                 | Biolegend           |
| anti-CD21            | 1:50            | FACS               | 7.00E+09     | APC/Cy7            | Mouse                 | Biolegend           |
| anti-CD23            | 1:50            | FACS               | B3B4         | APC                | Mouse                 | Biolegend           |
| anti-CD40            | 1:50            | FACS               | 3/23         | FITC               | Mouse                 | Biolegend           |
| anti-CD44            | 1:50            | FACS               | IM7          | APC/Cy7            | Mouse                 | Biolegend           |
| anti-CD45            | 1:50            | FACS               | 30-F11       | PE/Cy7, FITC       | Mouse                 | Biolegend           |
| anti-CD45R/B220      | 1:50            | FACS               | RA3-6B2      | PercP/Cy5.5        | Mouse                 | Biolegend           |
| anti-CD62L           | 1:50            | FACS               | MEL-14       | PE                 | Mouse                 | Biolegend           |
| anti-CD80            | 1:50            | FACS               | 16-10A1      | PE                 | Mouse                 | Biolegend           |
| anti-CD86            | 1:50            | FACS               | GL-1         | APC, APC/Cy7       | Mouse                 | Biolegend           |
| anti-CD138           | 1:50            | FACS               | 281-2        | PercP/Cy5.5        | Mouse                 | Biolegend           |
| anti-IgD             | 1:50            | FACS               | 1-26c.2a     | PE                 | Mouse                 | Biolegend           |
| anti-IgM             | 1:50            | FACS               | RMM-1        | PE/Cy7             | Mouse                 | Biolegend           |
| anti-Ly6C            | 1:50            | FACS               | HK1.4        | APC                | Mouse                 | Biolegend           |
| anti-Ly6G            | 1:50            | FACS               | 1A8          | BV421              | Mouse                 | Biolegend           |
| anti-MHCII           | 1:50            | FACS               | M5/114.15.2  | PerCP/Cy5.5        | Mouse                 | Biolegend           |
| anti-PDCA-1          | 1:50            | FACS               | 129c1        | PE                 | Mouse                 | Biolegend           |

|              |       |      |        |        |       |           |
|--------------|-------|------|--------|--------|-------|-----------|
| TruStain FcX | 1:100 | FACS | -      | -      | Human | Biolegend |
| anti-CD3     | 1:50  | FACS | UCHT1  | BV421  | Human | Biolegend |
| anti-CD11c   | 1:50  | FACS | 3.9    | PE/Cy7 | Human | Biolegend |
| anti-CD14    | 1:50  | FACS | M5E2   | A488   | Human | Biolegend |
| anti-CD19    | 1:50  | FACS | HIB19  | PE     | Human | Biolegend |
| anti-CD56    | 1:50  | FACS | 5.1H11 | APC    | Human | Biolegend |
| anti-MHCI    | 1:50  | FACS | W6/32  | PE     | Human | Biolegend |
| anti-MHCII   | 1:50  | FACS | L243   | APC    | Human | Biolegend |

**Supplemental Table 2. List of antibodies.**

| <b>Cytokines and TLR Agonists</b> | <b>Vendor</b> |
|-----------------------------------|---------------|
| mIFN- $\lambda$ 2                 | Peprtech      |
| mIFN- $\alpha$ 1                  | Biologend     |
| hIFN- $\lambda$ 1                 | R&D Systems   |
| hIFN- $\alpha$                    | Peprtech      |
| Imiquimod (R837)                  | Invivogen     |
| Poly I:C                          | Invivogen     |
| LPS                               | Invivogen     |
| R848                              | Invivogen     |
| CpG                               | Invivogen     |

**Supplemental Table 3. List of recombinant cytokines and chemical reagents.**
